# Supplementary material for: CAF-1 and Rtt101p function within the replication-coupled chromatin assembly network to promote H4 K16ac, preventing ectopic silencing
Source: PubMed Central journal article supplement (PMC7746308; doi:10.1371/journal.pgen.1009226), 2020-12-07

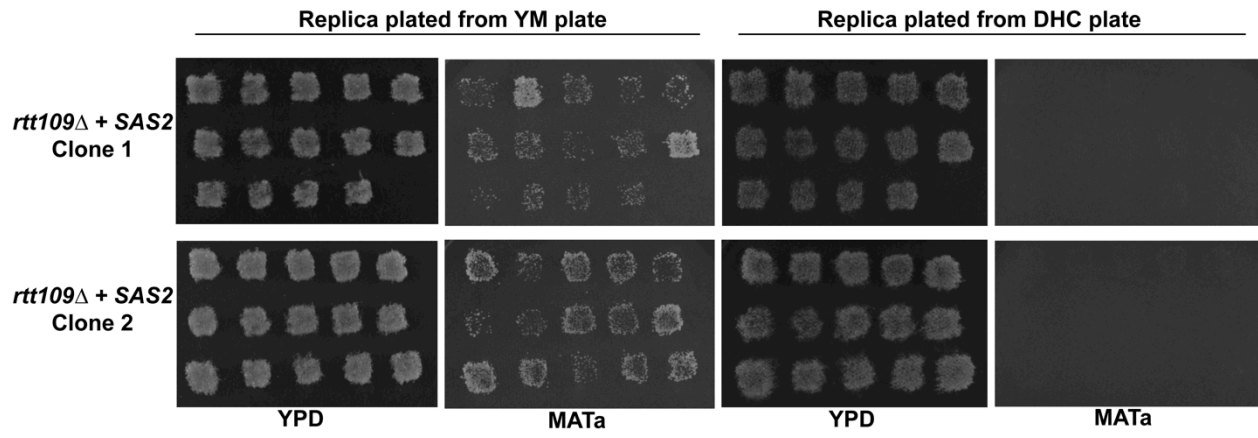

Supplement: pgen.1009226.s008.pdf [file pgen.1009226.s008.pdf]
